# Supplementary material
Source: publisher figshare collection journal article supplement (https://acs.figshare.com/ndownloader/files/25633074)
Supplement: Supplementary file 1 [file 25633074]

## Electronic Supplementary Information

# Ligand design for specific MHC class I molecules on the cell surface

Xizheng Sun<sup>a</sup>, Reika Tokunaga<sup>a</sup>, Yoko Nagai<sup>a</sup>, Ryo Miyahara<sup>a</sup>, Akihiro Kishimura<sup>a,b,c,d</sup>, Shigeru Kawakami<sup>e</sup>, Yoshiki Katayama<sup>a,b,c,d,f,g,\*</sup>, Takeshi Morij<sup>a,b,c,\*</sup>

<sup>a</sup>Graduate School of Systems Life Sciences, Kyushu University, 744 Motooka, Nishi-ku, Fukuoka 819-0395, Japan.

<sup>b</sup>Department of Applied Chemistry, Faculty of Engineering, Kyushu University, 744 Motooka, Nishi-ku, Fukuoka 819-0395, Japan.

<sup>c</sup>Center for Future Chemistry, Kyushu University, 744 Motooka, Nishi-ku, Fukuoka 819-0395, Japan.

<sup>d</sup>International Research Center for Molecular Systems, Kyushu University, 744 Motooka, Nishi-ku, Fukuoka 819-0395, Japan.

<sup>e</sup>Department of Pharmaceutical Informatics, Graduate School of Biomedical Sciences, 1-7-1 Sakamoto, Nagasaki 852-8588, Japan.

<sup>f</sup>Center for Advanced Medical Innovation, Kyushu University, 744 Motooka, Nishi-Ku, Fukuoka 819-0395, Japan.

<sup>g</sup>Department of Biomedical Engineering, Chung Yuan Christian University, 200 Chung Pei Rd., Chung Li, 32023 ROC, Taiwan.

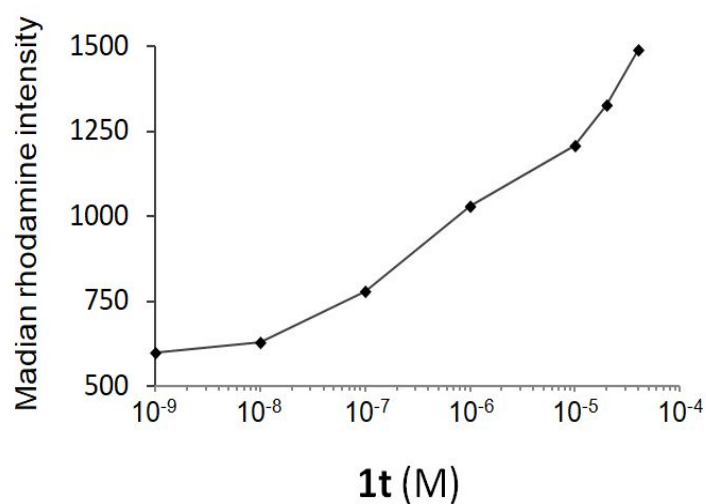

**Figure S1.** Effect of concentration of peptide **1t** on the binding with RMA cells. Cells were treated with **1t** in serum-containing medium for 1 h at 37 °C. After washing three times with serum-free medium, cells were detected by image-based cytometer. The fluorescence intensity was not saturated in the examined concentration range (up to 40  $\mu$ M). Since we found that 0.8  $\mu$ M of peptide provided enough fluorescence to be detectable by fluorescence microscopy, we chose this concentration in most of the experiments.

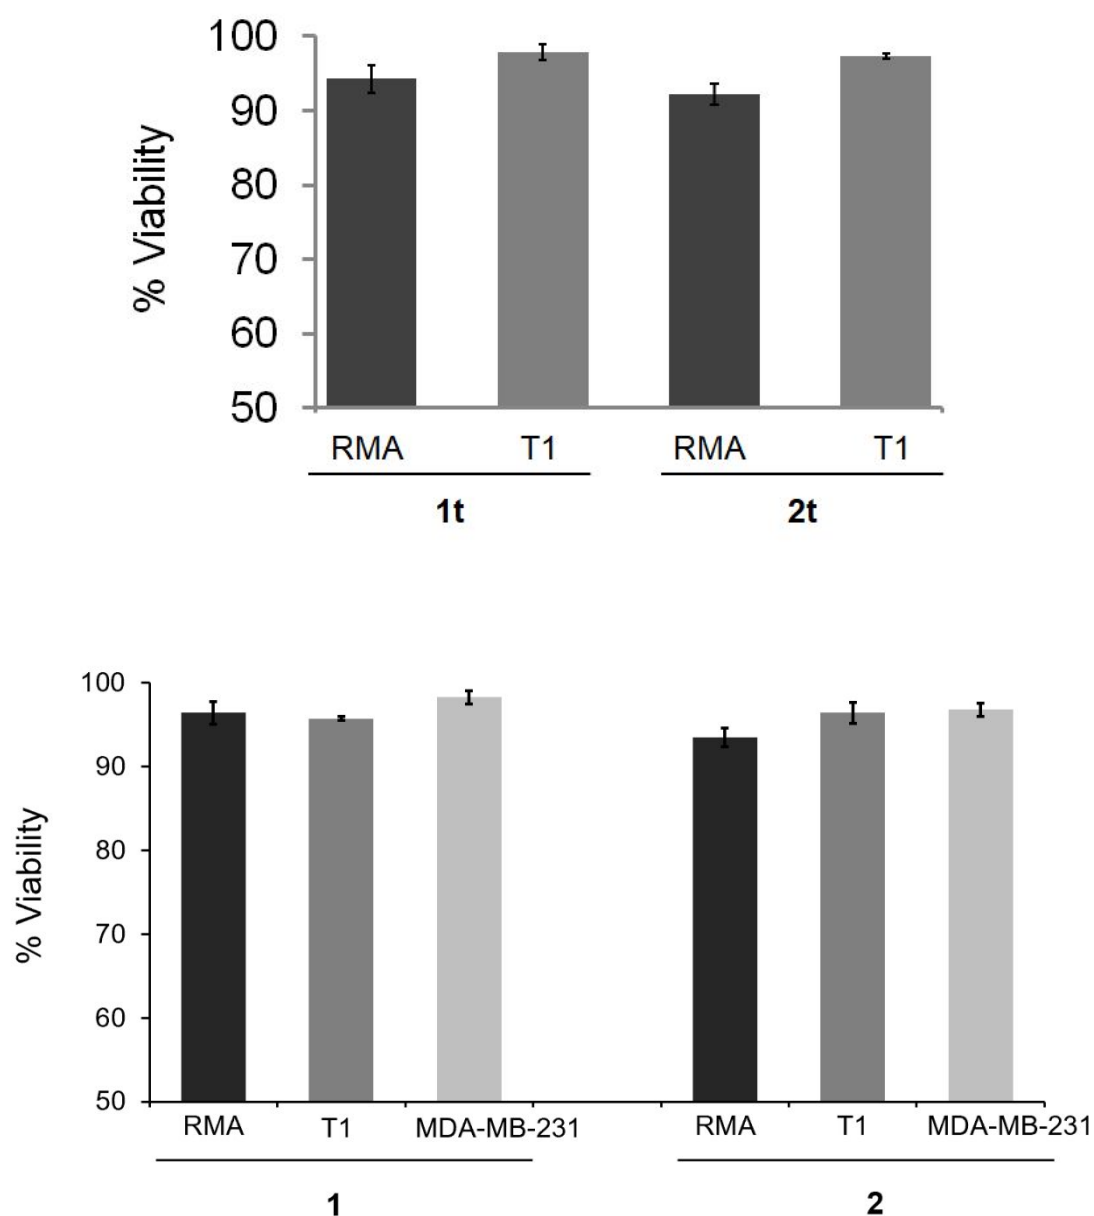

**Figure S2.** Viability of cells after treatment of **1t** or **2t** (0.8 μM) (above), and after treatment of **1** or **2** (80 μM) (below). Cells were treated with each peptide in serum-containing medium for 1 h at 37 °C. After washing three times with serum-free medium, dead cells were stained with propidium iodide (PI) solution (2 μg/ml) (Sigma, St. Louis, USA) for 15 min on ice. The dead cells were counted by image-based cytometer.

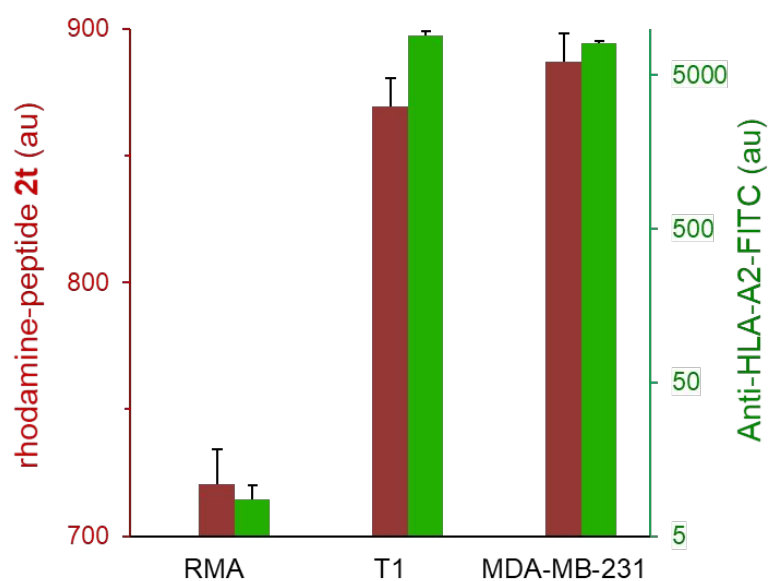

**Figure S3.** Correlation of bound ligand peptide **2t** and cell surface expression of HLA A02:01. To stain HLA A02:01, cells were treated with FITC-labeled anti-HLA-A2 mAb (8  $\mu\text{g/ml}$ ) for 30 min at 4°C. The fluorescence intensity of FITC was quantified by flow cytometer (Cytoflex). The binding of **2t** with HLA A02:01 on the cell surface was conducted as follows. Cells were treated with **2t** (0.8  $\mu\text{M}$ ) in serum-containing medium for 1 h at 37°C, then washed three times with serum-free medium. The fluorescence intensity was quantified by image-based cytometer.

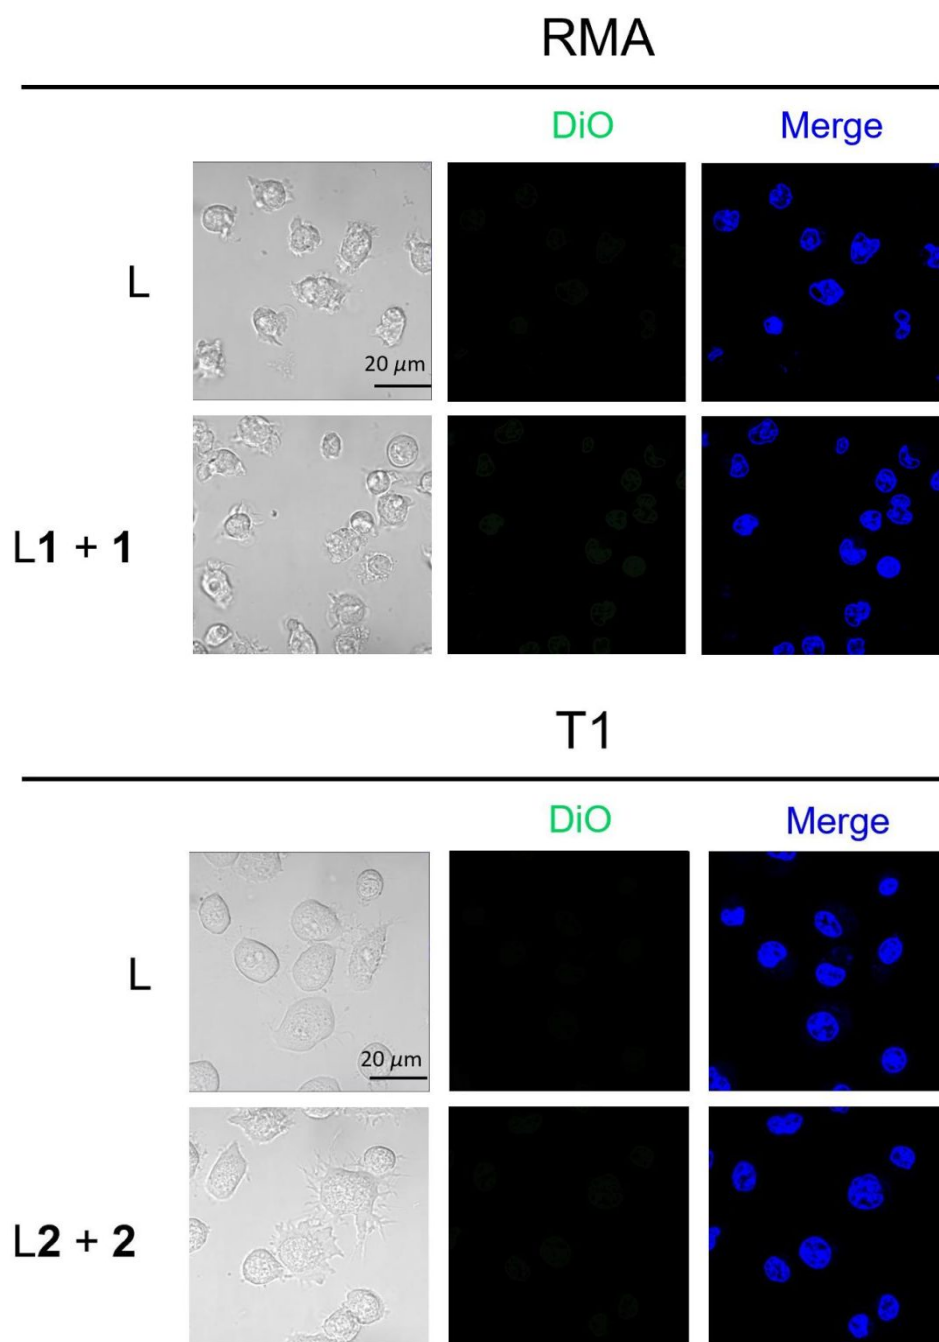

**Figure S4.** Evaluation of the specific binding of peptide-modified liposomes to RMA or T1 cells. Cells in group **L** were treated with 100  $\mu$ M of liposomes (containing no ligand peptide); cells in group **L1 + 1** and **L2 + 2** were preincubated with no-labeled peptides **1** or **2** (100  $\mu$ M) for 1 hour before adding the **L1** or **L2** liposomes (100  $\mu$ M, containing 3  $\mu$ M of ligand peptides) respectively. After washing three times with serum-free medium, cells were observed by confocal laser scanning microscopy. Blue and green color represent the nucleus and DiO-labeled liposome, respectively.

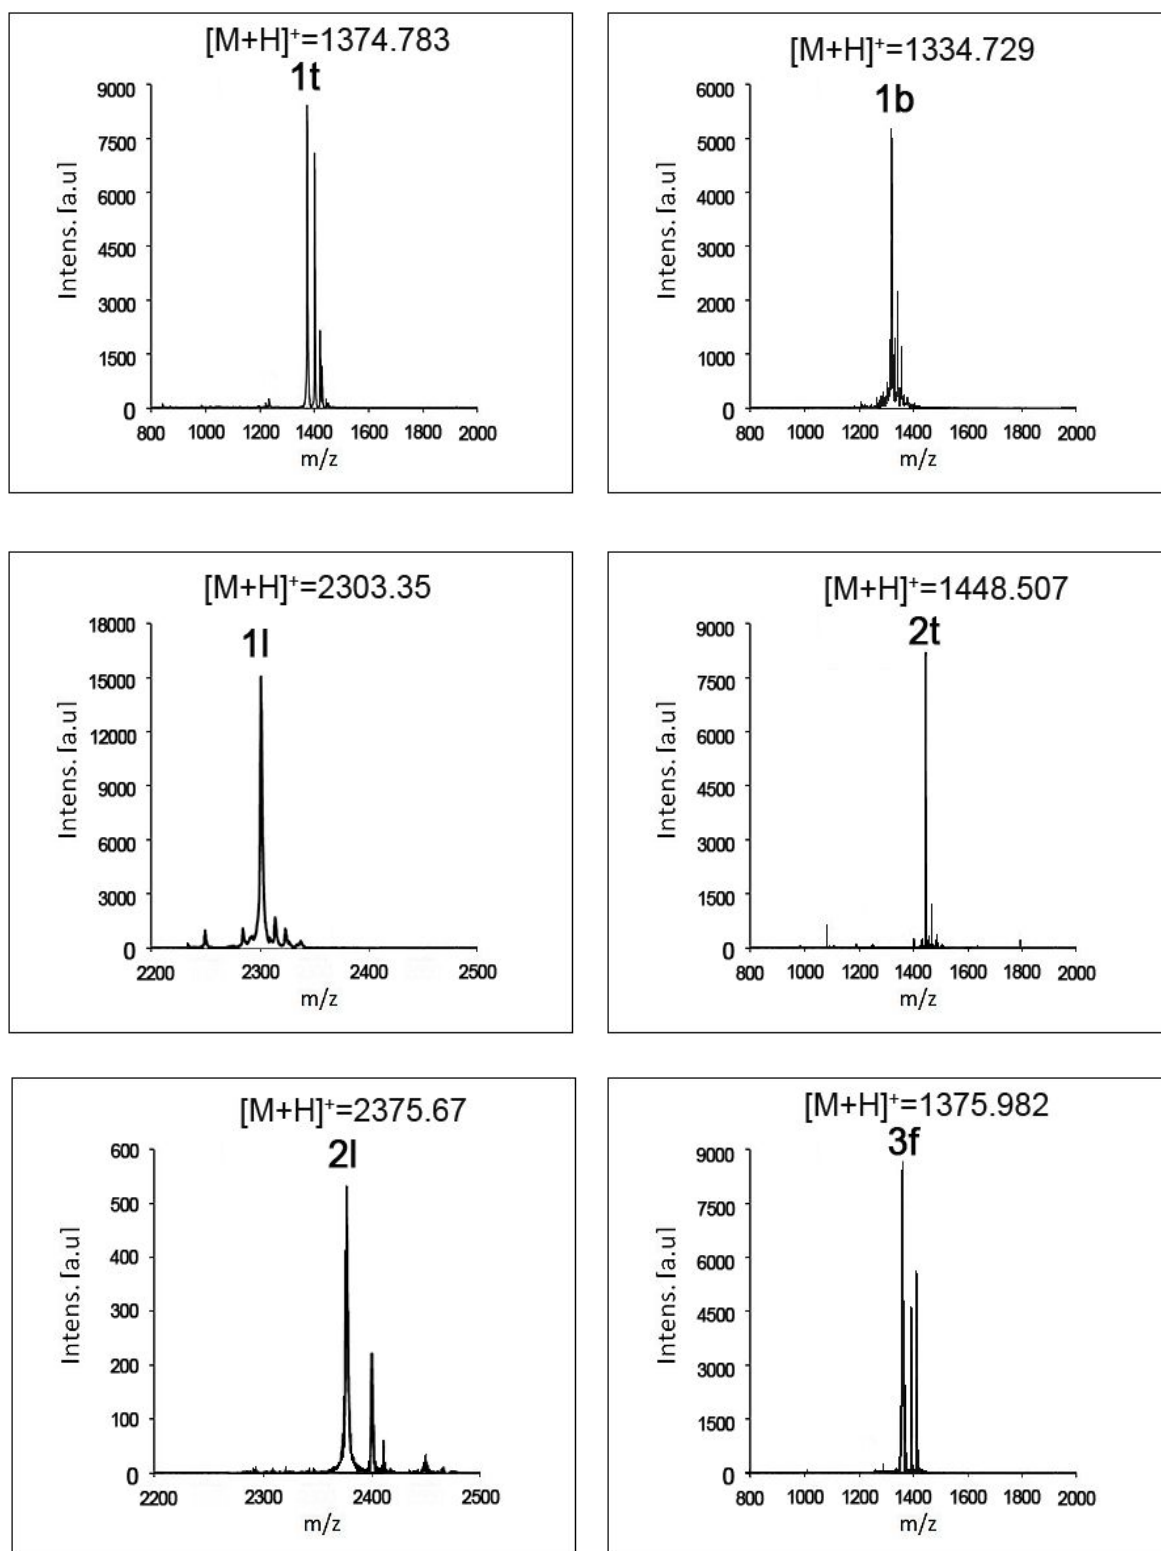

**Figure S5.** Molecular weight of the ligand peptides. The obtained peptides were identified by a matrix-assisted laser desorption ionization time-of-flight mass spectrometer (Bruker Daltonics, Billerica, MA, USA).

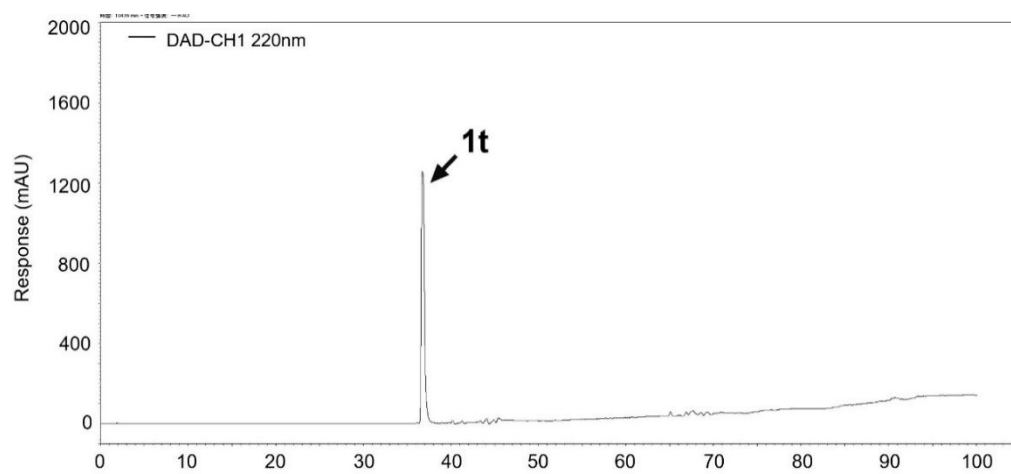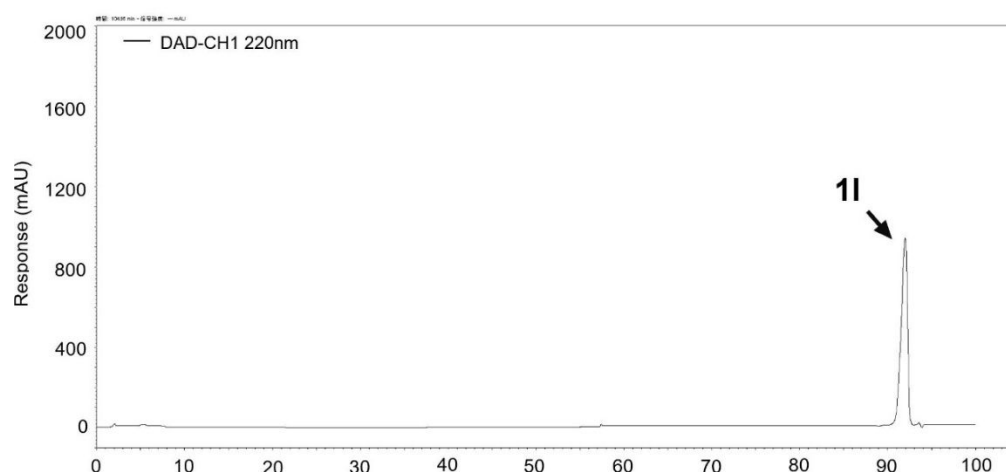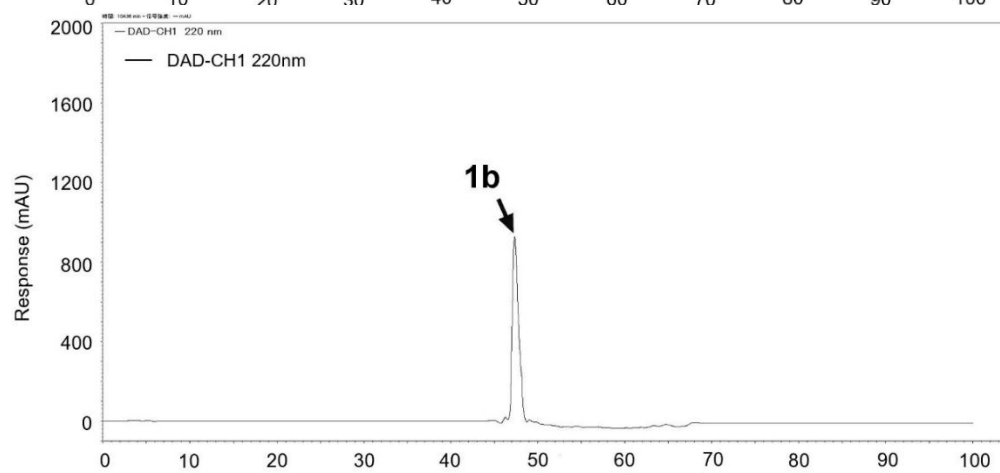

Retention time (min)

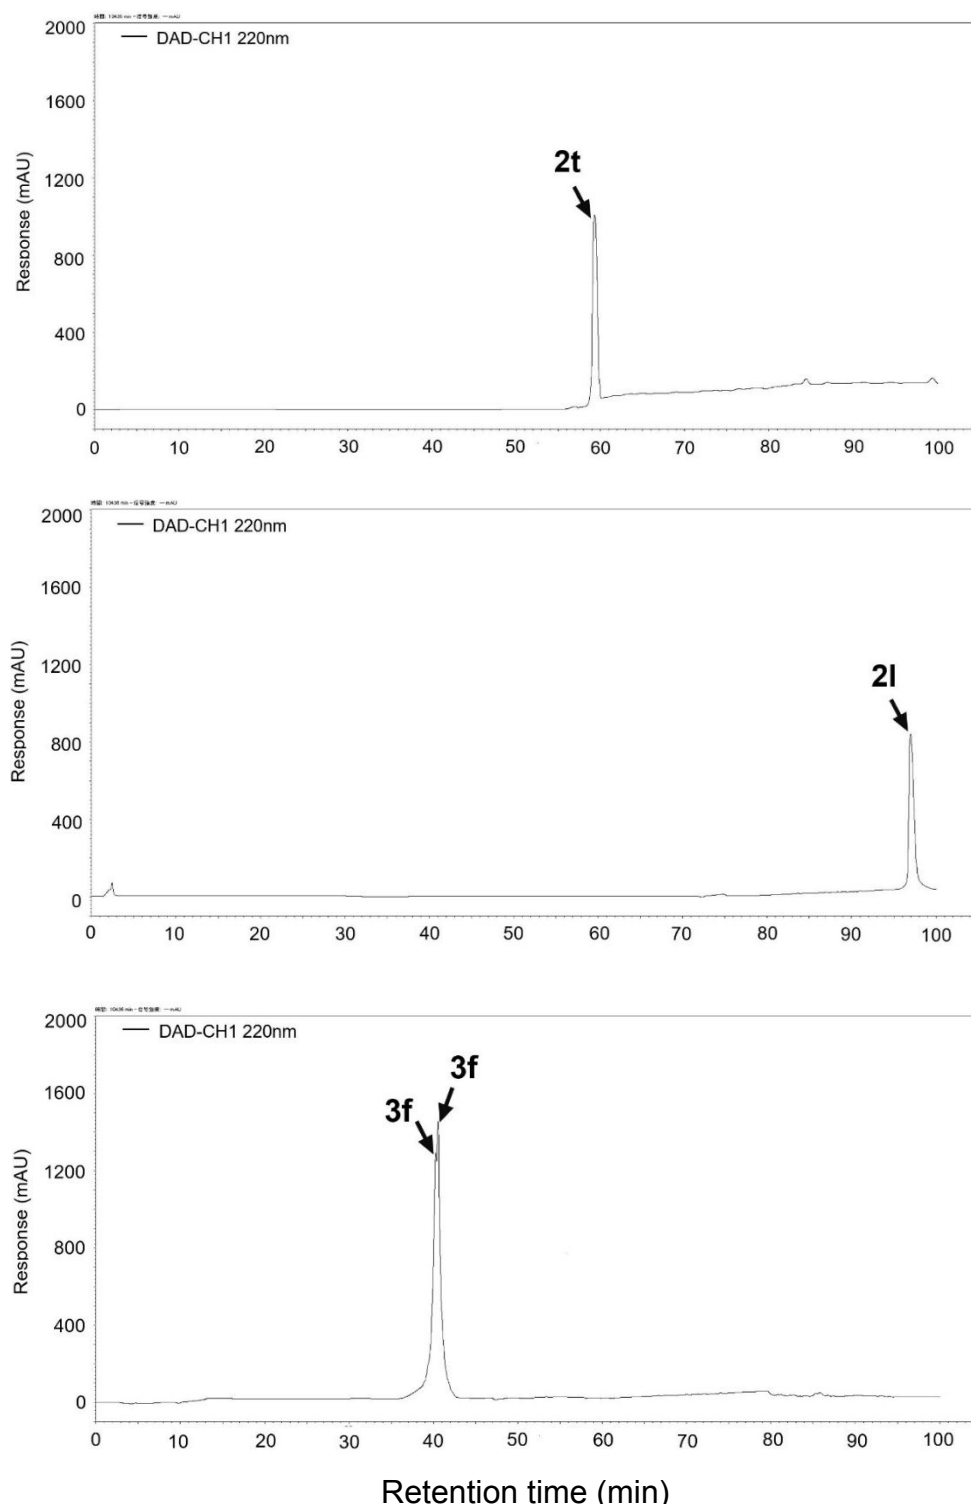

**Figure S6.** Chromatograms of the purified ligand peptides. The purified peptides were analyzed by reversed-phase HPLC (Hitachi La Chrom Elite, Tokyo, Japan) on a Protein-R column (Nacalai Tesque,



Kyoto, Japan) using a mobile phase consisting of acetonitrile/0.1% TFA (0% to 100% v/v) (for **1t**, **2t** and **3f**) or methanol/0.1% TFA (0% to 100% v/v) (for **1b**, **1l** and **2l**).

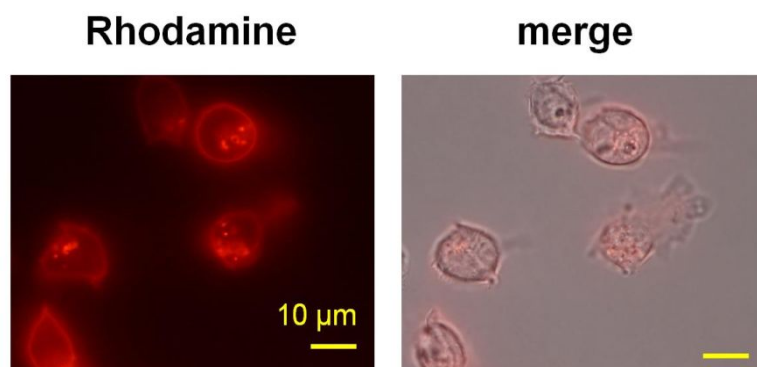

**Figure S7.** Fluorescence microscope images of RMA cells treated with TAMRA-labeled peptide **1t** (0.8  $\mu$ M) in serum-containing medium for 3 h at 37 °C. After washing three times with serum-free medium, cells were observed by fluorescence microscopy.
